# Supplementary material
Source: PubMed Central journal article supplement (PMC10107122)

**Figure S1**

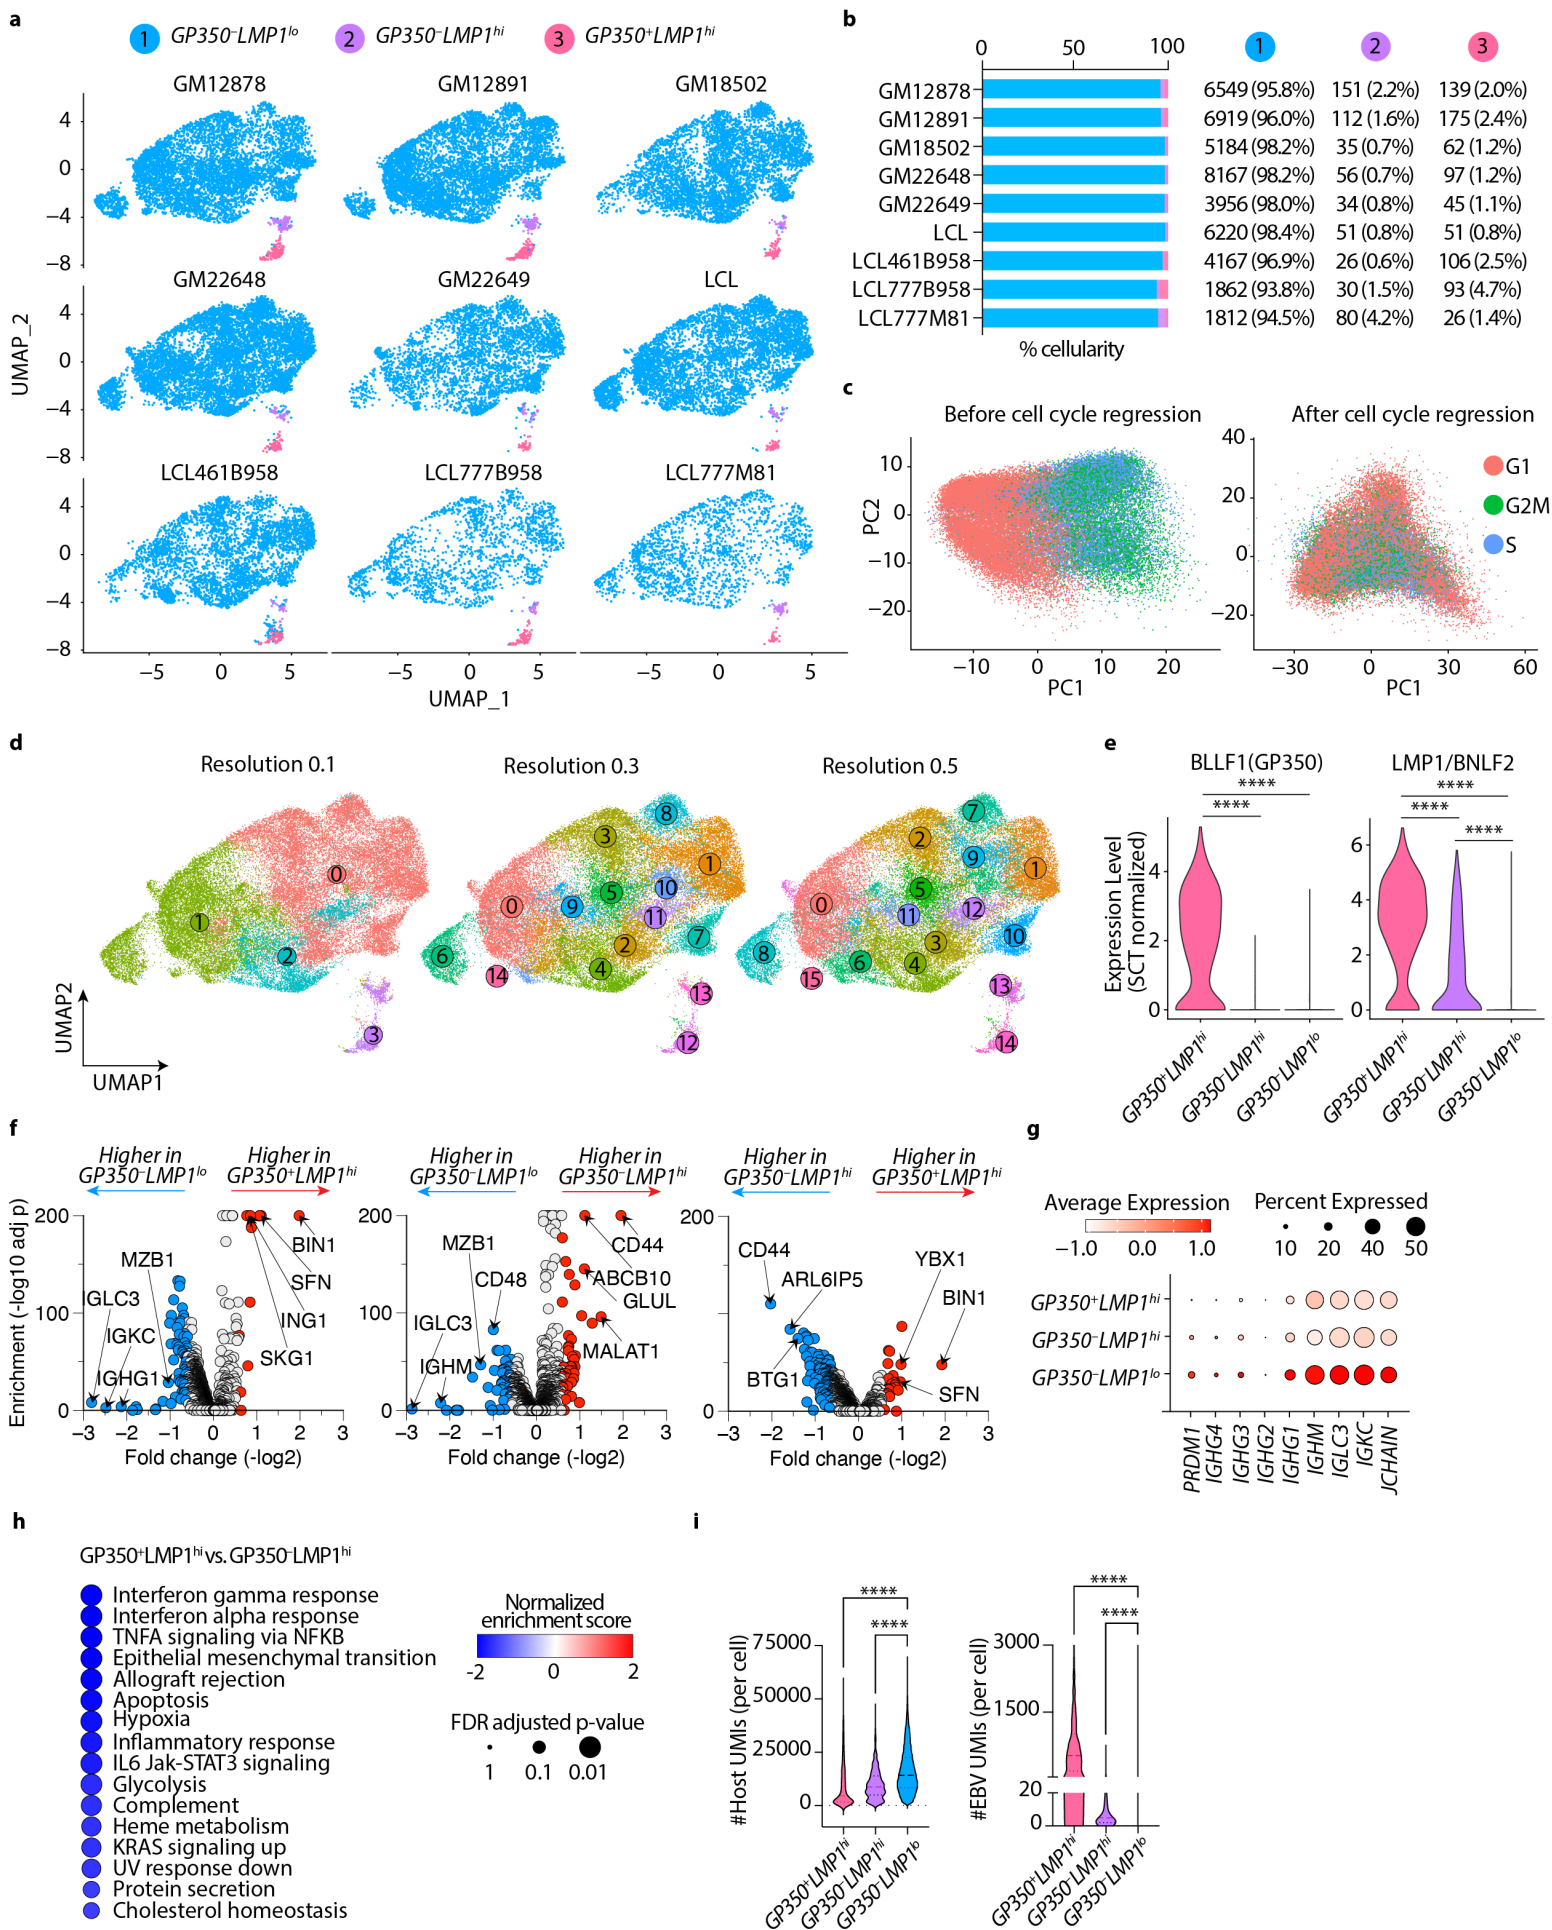

**Figure S2**

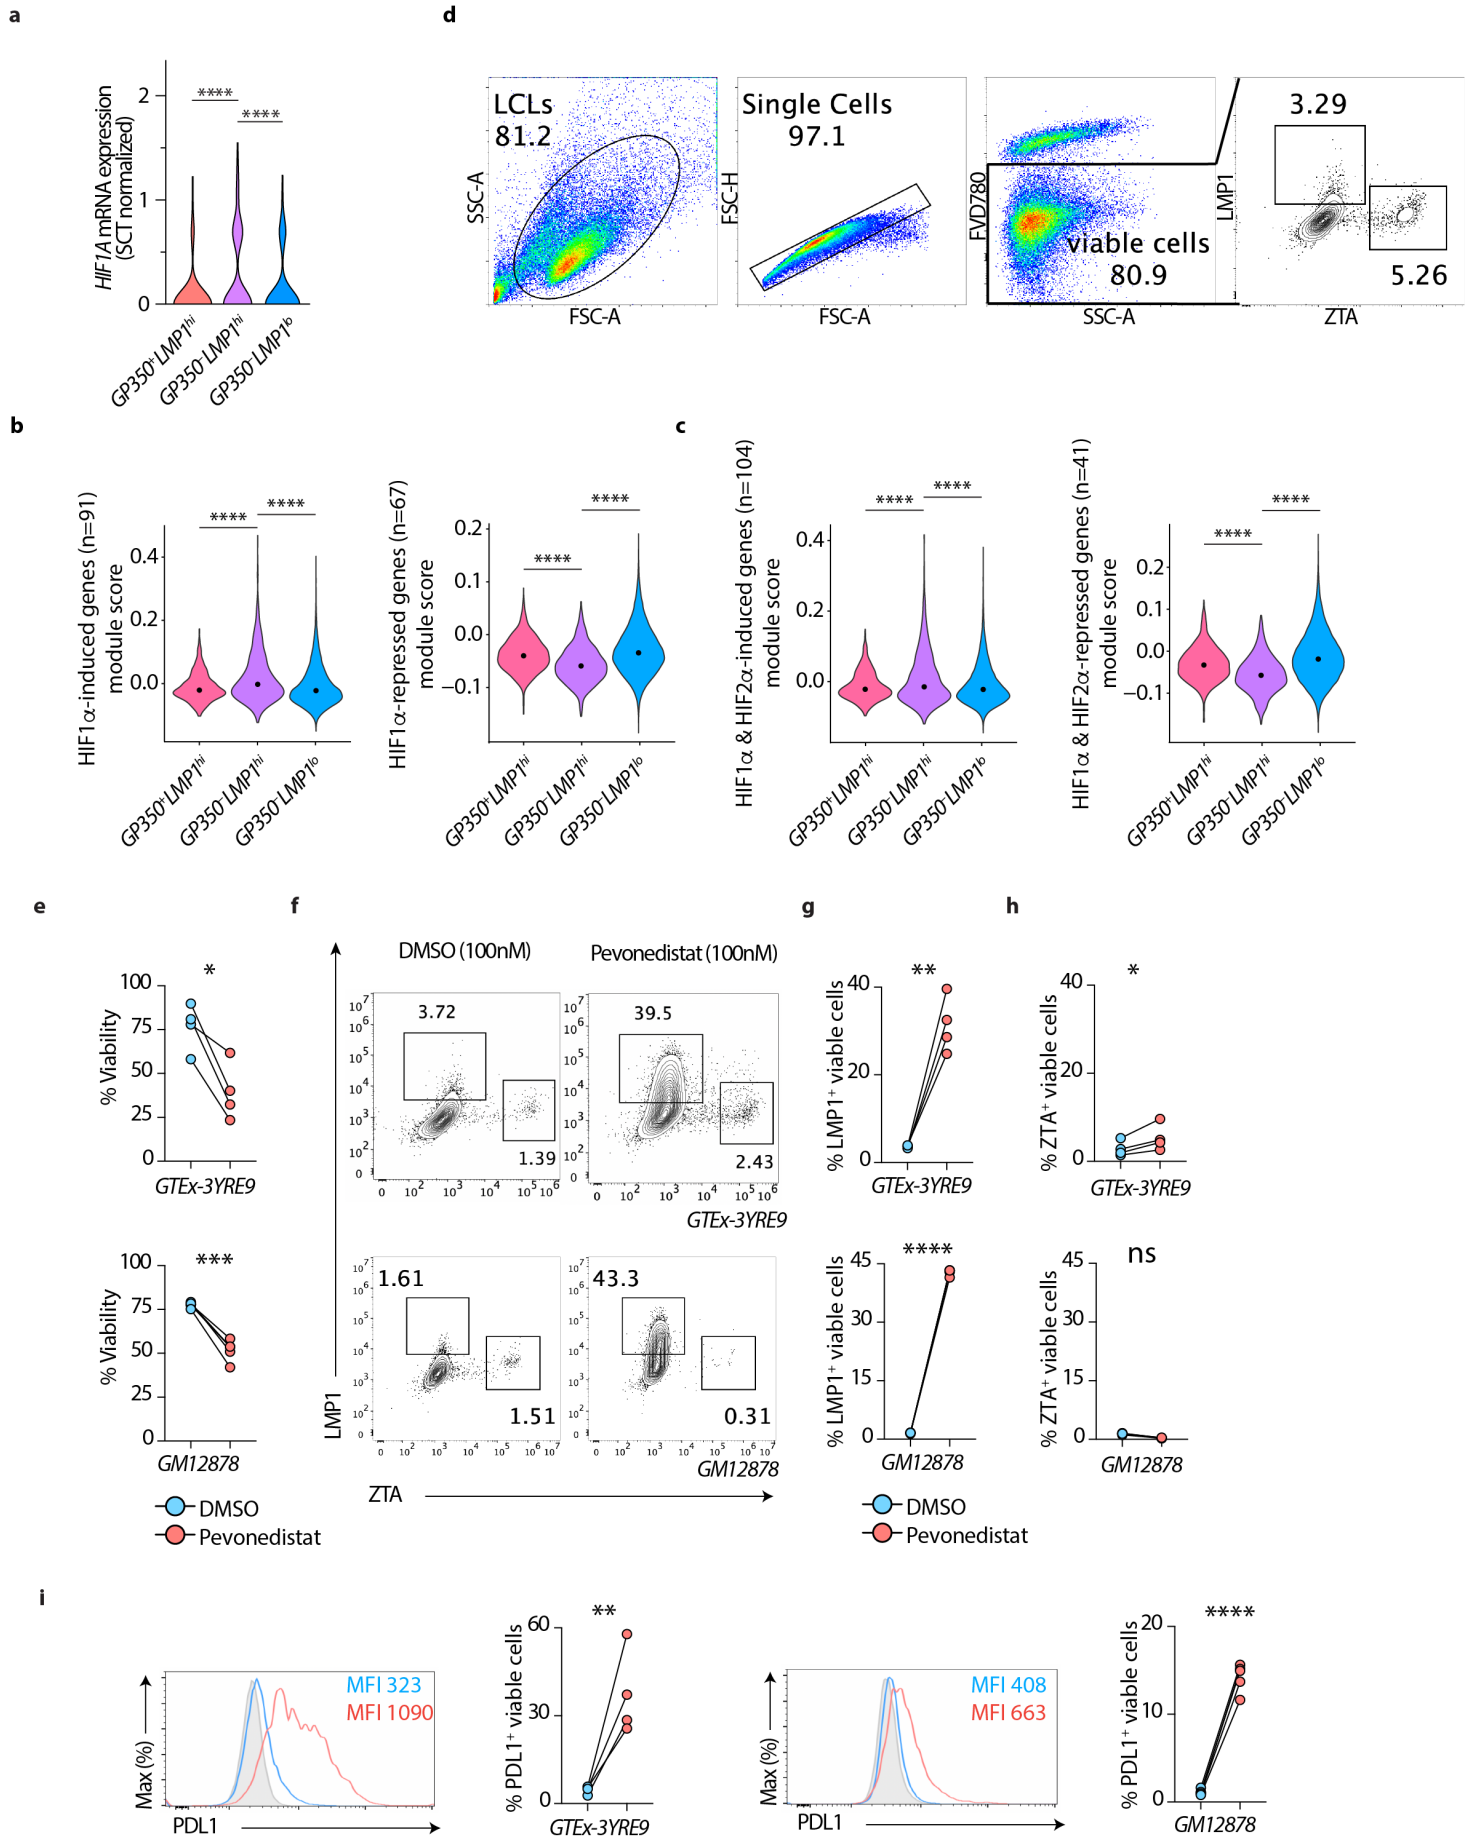

Figure S3

a

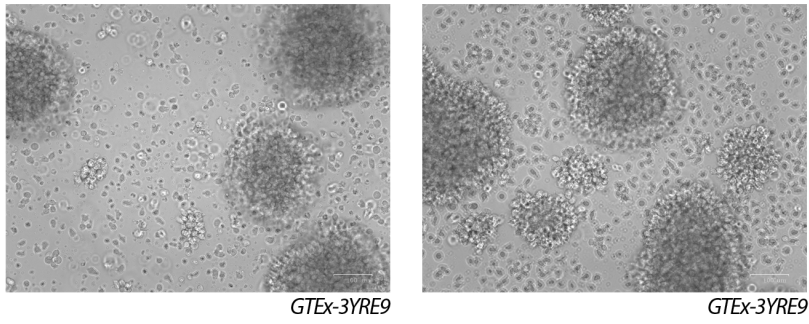

b

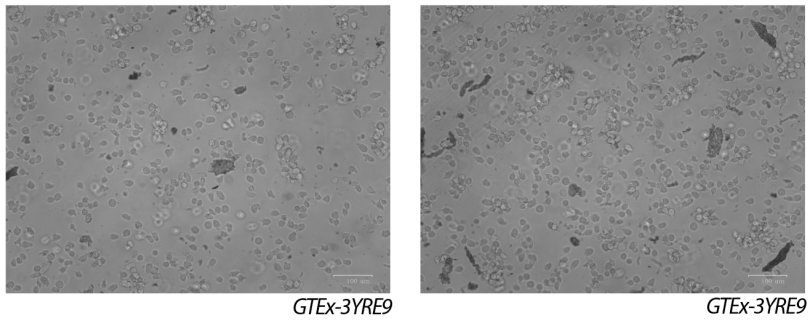

c

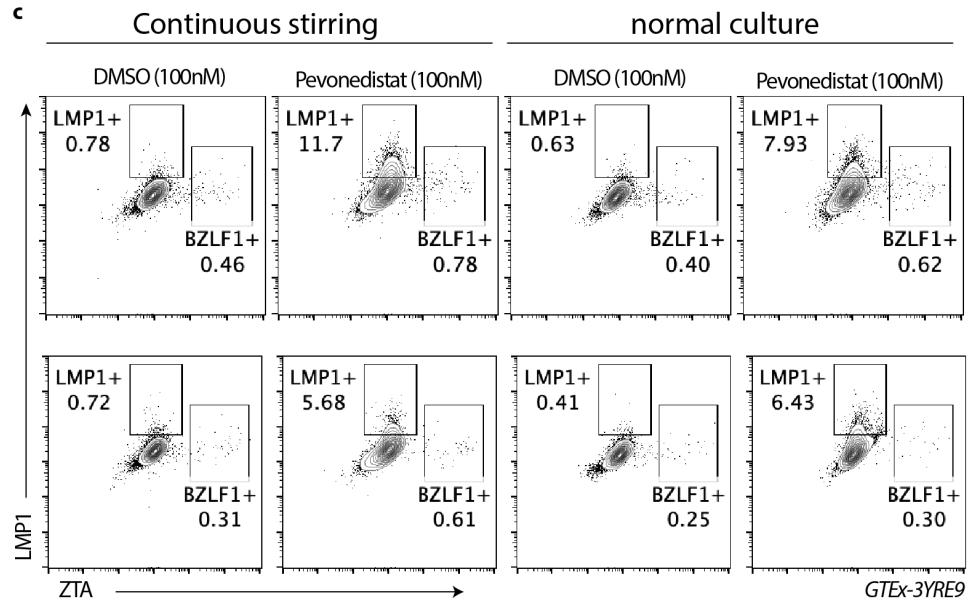

**Figure S4**

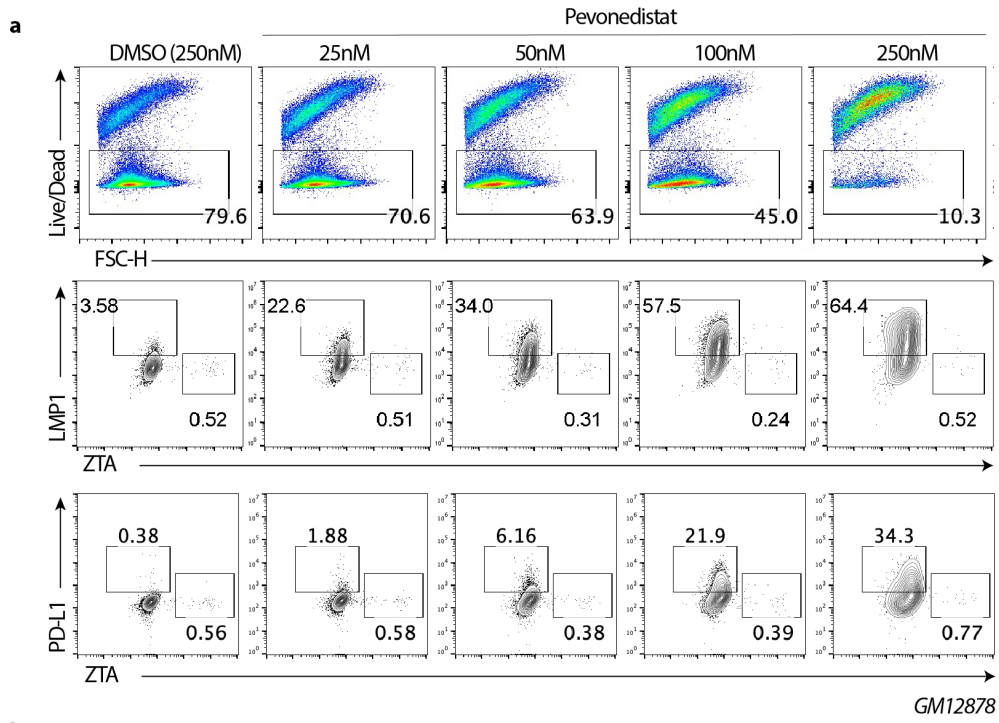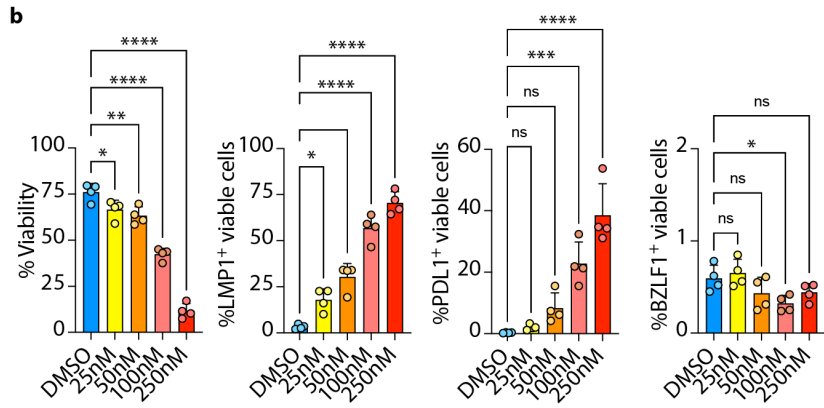

Figure S5

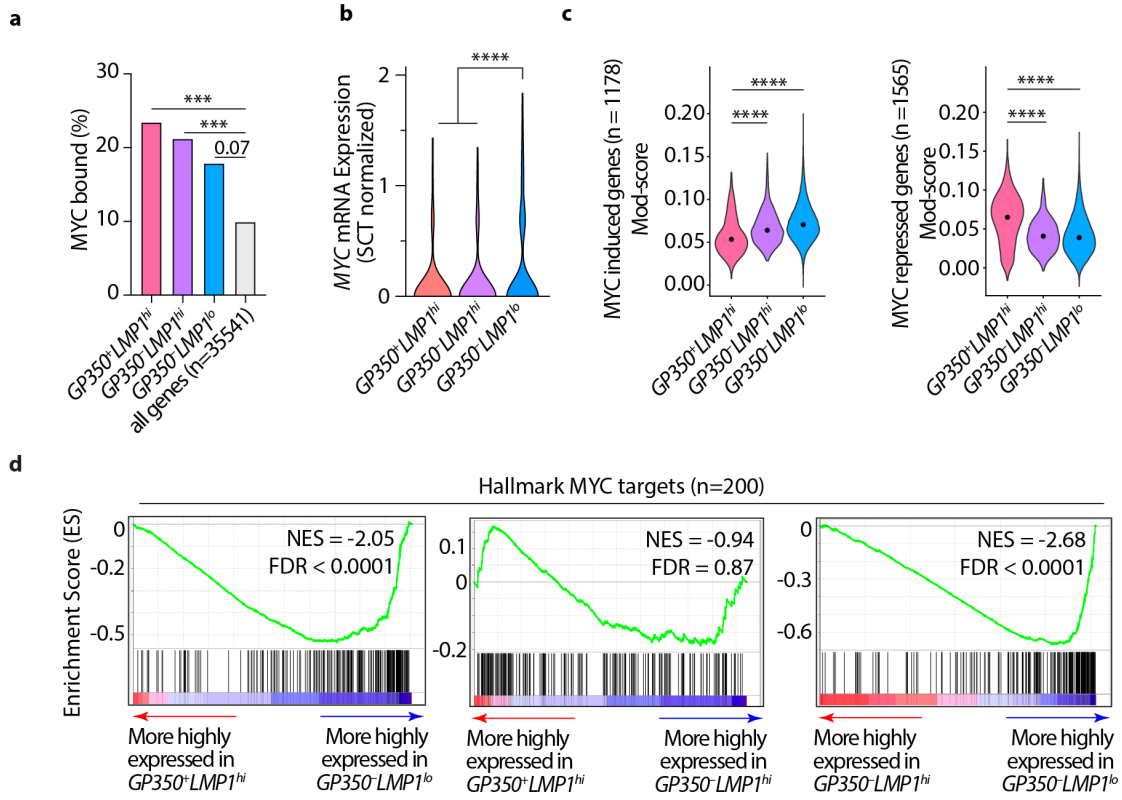

Figure S6

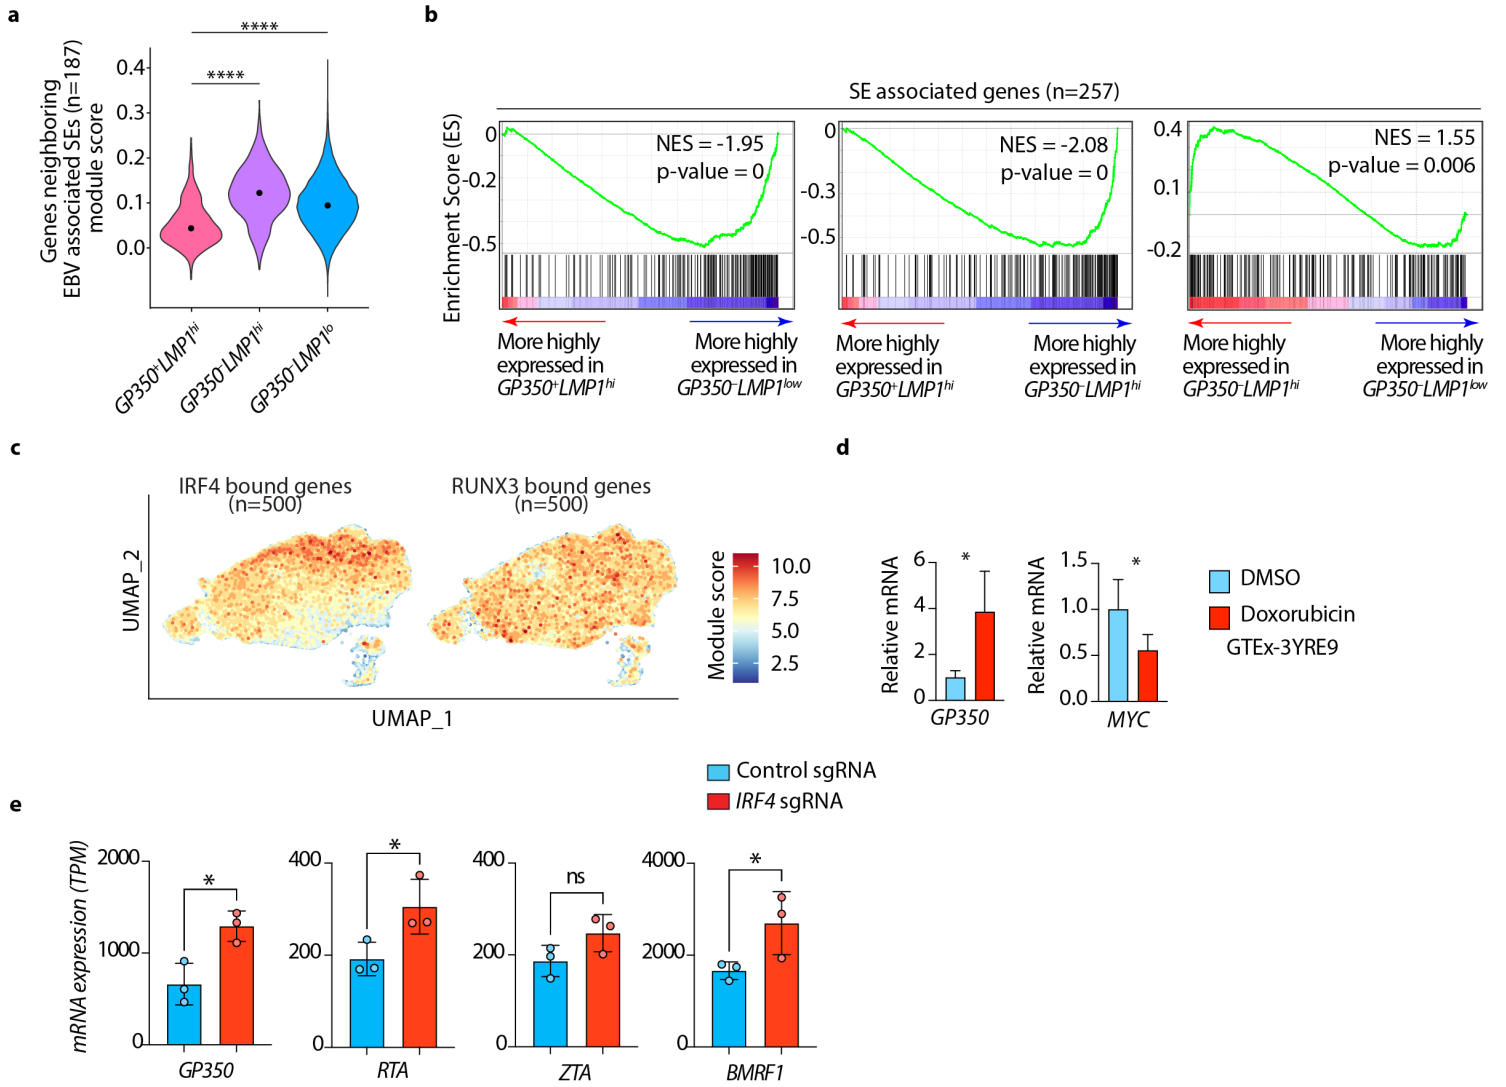



**Figure S7**

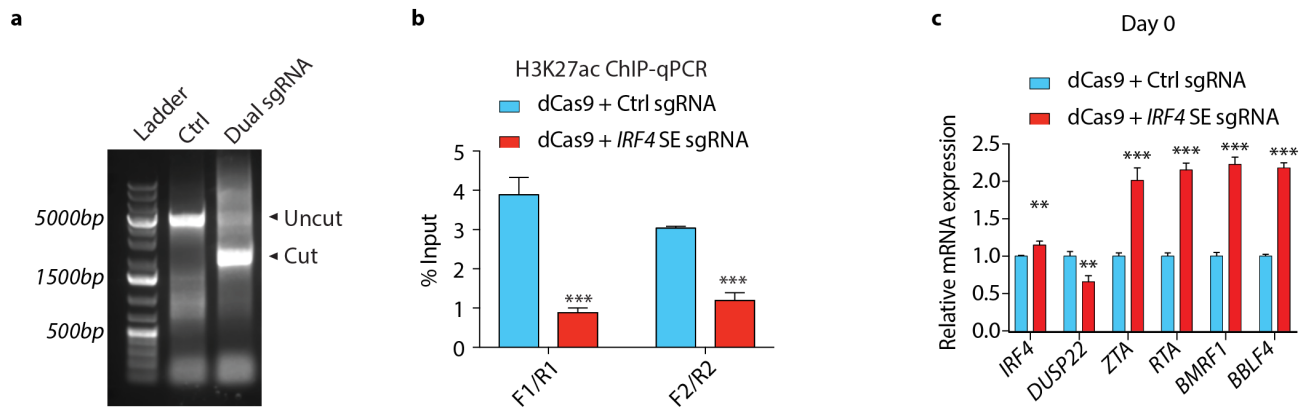

Supplement: JMV-95-0-s001.pdf [file JMV-95-0-s001.pdf]
